# Supplementary material
Source: Springer Nature journal article supplement (https://www.springermedizin.de/resource/supplementary/12879_2011_1943_MOESM3_ESM.pdf/9443290)
Supplement: MOESM3 [file 9443290]

Promotor region

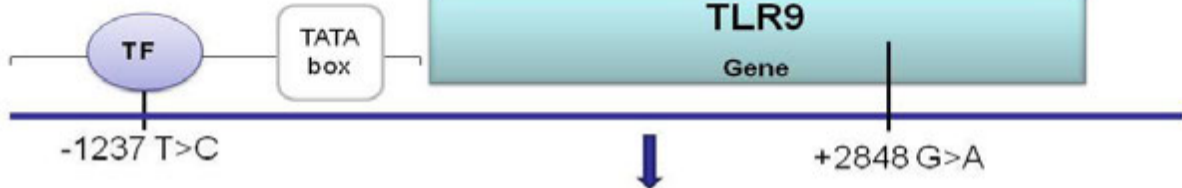

-1237 T>C

+2848 G>A

**Wild type-1237/T** GGGGGAGTTTT**T**CAGGCAGAGG

**Mutant -1237/C** GGGGGAGTTTT**C**CAGGCAGAGG

**NF-kB consensus sequence** GGGRNNYY**C**C

**RelA consensus sequence** GGRNWTT**C**C

**STAT3 consensus sequence** TT**C**CDGGAAR
